# CORRECTION

## Correction: Individual differences in associative/semantic priming: Spreading of activation in semantic memory and epistemically unwarranted beliefs

The *PLOS One* Staff

### Notice of Republication

This article was republished on August 5, 2025, to correct errors in the affiliations, missing reference links, and various in-text typos.

The publisher apologizes for the errors. Please download this article again to view the correct version. The originally published, uncorrected article and the republished, corrected articles are provided here for reference.

### Supporting information

**S1 File. Originally published, uncorrected article.**

(S1\_File.PDF)

**S2 File. Republished, corrected article.**

(S2\_File.PDF)

### Reference

1. Huete-Pérez D, Davies R, Rodríguez-Ferreiro J, Ferré P. Individual differences in associative/semantic priming: Spreading of activation in semantic memory and epistemically unwarranted beliefs. *PLoS One*. 2025;20(2):e0313239. <https://doi.org/10.1371/journal.pone.0313239> PMID: [39932961](https://pubmed.ncbi.nlm.nih.gov/39932961/)

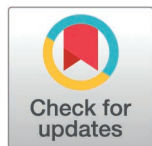

### OPEN ACCESS

**Citation:** The *PLOS One* Staff (2025) Correction: Individual differences in associative/semantic priming: Spreading of activation in semantic memory and epistemically unwarranted beliefs. *PLoS One* 20(8): e0330531. <https://doi.org/10.1371/journal.pone.0330531>

**Published:** August 18, 2025

**Copyright:** © 2025 The *PLOS One* Staff. This is an open access article distributed under the terms of the [Creative Commons Attribution License](https://creativecommons.org/licenses/by/4.0/), which permits unrestricted use, distribution, and reproduction in any medium, provided the original author and source are credited.
